# Supplementary material for: Green oxygen power plants in the brain rescue neuronal activity
Source: PubMed Central journal article supplement — iScience. 2021 Oct 13;24(10):103158. doi: 10.1016/j.isci.2021.103158 (PMC8560625; doi:10.1016/j.isci.2021.103158), 2021-10-13
Supplement: mmc1.pdf [file mmc1.pdf]

**iScience, Volume 24**

**Supplemental information**

**Green oxygen power plants in the brain**

**rescue neuronal activity**

**Suzan Özugur, Myra N. Chávez, Rosario Sanchez-Gonzalez, Lars Kunz, Jörg Nickelsen, and Hans Straka**

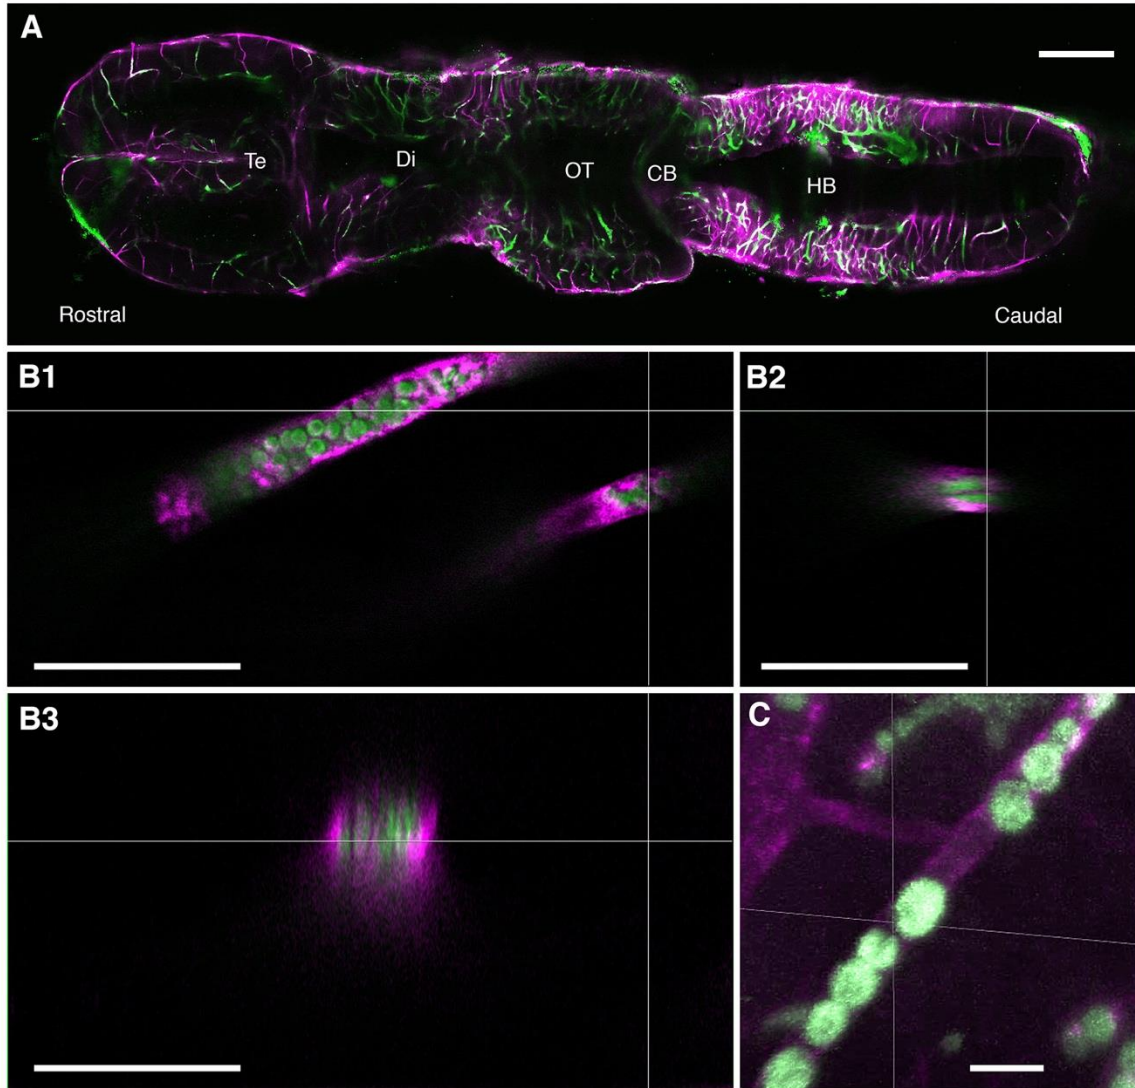

**Supplemental fig. S1. Photosynthetic microorganisms in brain blood vessels (Related to Fig. 1G-J).** (A) Confocal reconstruction of a *Xenopus laevis* whole brain illustrating Isolectin-labeled endothelial walls of blood vessels (magenta) and chlorophyll autofluorescence of transcardially injected *Synechocystis* 6803 (green). (B, C) Confocal reconstruction of blood vessels in the hindbrain (B1) and optical sections in orthogonal projection planes (B2, B3), demonstrating the containment of the microorganisms (green; *Synechocystis* 6803 in B, *C. reinhardtii* in C) inside the blood vessels (magenta). Calibration bars represent 1 mm (a), 20  $\mu\text{m}$  (B1-3) and 10  $\mu\text{m}$  (C); Te, telencephalon; Di, diencephalon; OT, optic tectum; CB, cerebellum; HB, hindbrain.

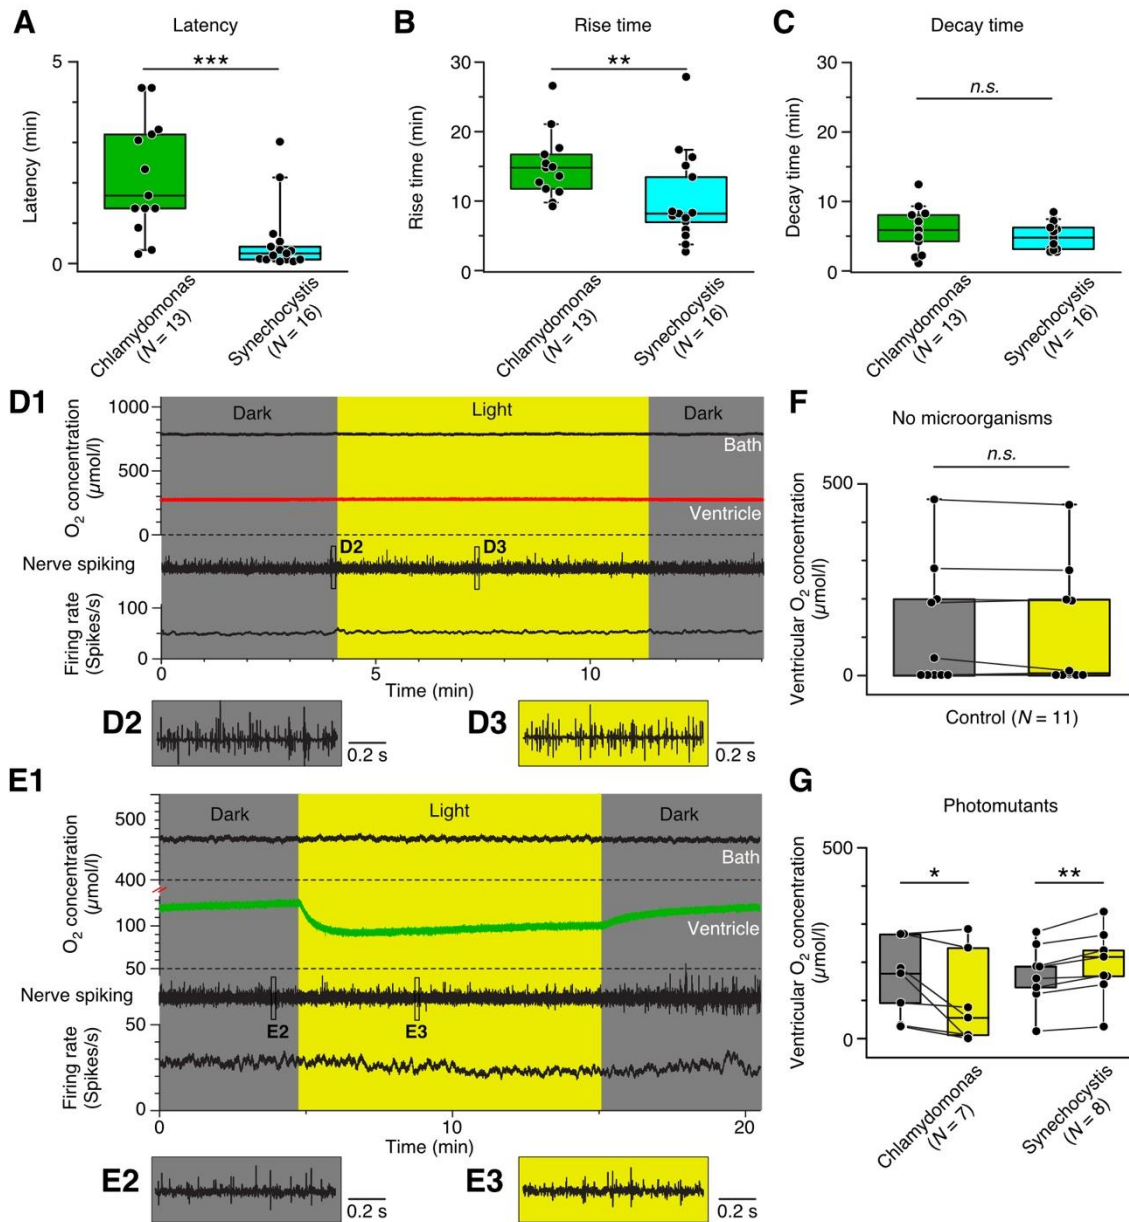

**Supplemental fig. S2. Specificity of photosynthetic oxygen production (Related to Fig. 2).** (A, B, C) Boxplots depicting latency (A), rise (B) and decay (C) times of light-induced increases in ventricular O<sub>2</sub> levels in preparations containing either *C. reinhardtii* or *Synechocystis* 6803; \*\*,  $p < 0.01$ , \*\*\*,  $p < 0.001$ , Mann Whitney *U*-test. (D, E) Episodes (D1, E1) of O<sub>2</sub> concentration recordings in the bath chamber (black trace) and IV<sup>th</sup> ventricle (red and green trace in D, E) and of concurrent *superior oblique* nerve spiking and mean firing rate (black traces) in darkness and light in a preparation without microorganisms (D) and a preparation containing *C. reinhardtii* photomutants (E); in light, the ventricular O<sub>2</sub> concentration remains unaltered in the control (red trace in D) and even decreases in the preparation containing *C. reinhardtii* photomutants (green trace in E); insets show nerve spiking in darkness (D2, E2) and light (D3, E3) at higher temporal resolution. (F, G) Boxplots depicting ventricular O<sub>2</sub> concentrations in darkness (gray bars) and light (yellow bars) in preparations containing no microorganisms (F) or photomutants of *C. reinhardtii* or *Synechocystis* 6803 (G); \*,  $p < 0.05$ , \*\*,  $p < 0.01$ ; Wilcoxon signed-rank test in F, G; n.s. not significant.

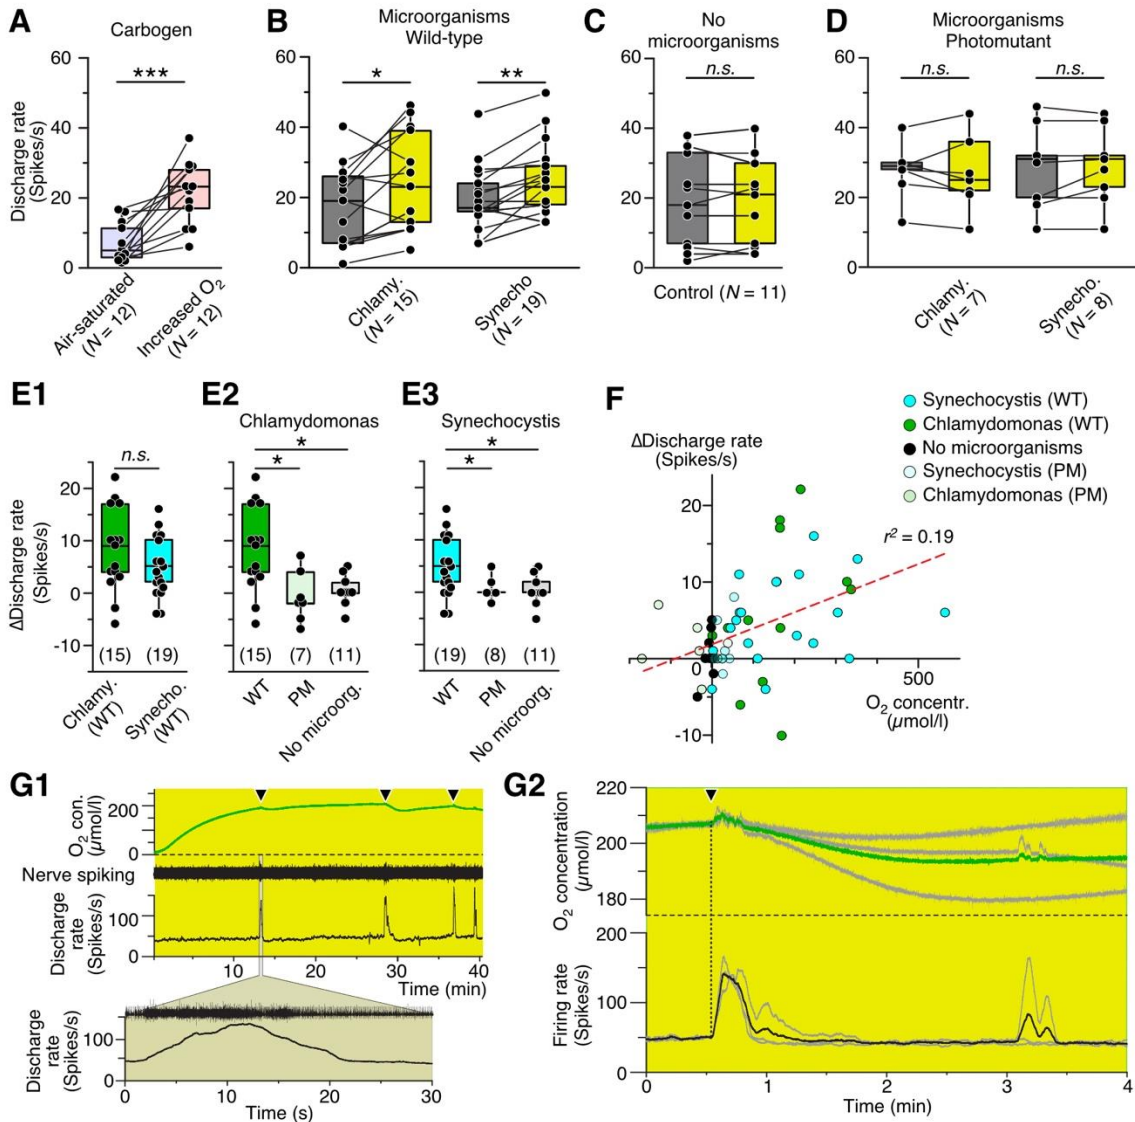

**Supplemental fig. S3. Impact of enhanced oxygen concentration on neuronal discharge (Related to Fig. 2).** (A, B, C, D) Boxplots depicting *superior oblique* nerve discharge rates at air-saturated ( $277 \pm 3 \mu\text{mol/l}$ , mean  $\pm$  sem) and carbogen-enhanced ( $803 \pm 52 \mu\text{mol/l}$ , mean  $\pm$  sem) bath O<sub>2</sub> levels (A) and in preparations with wild-type (WT) *C. reinhardtii* or *Synechocystis* 6803 (B), without microorganisms (C) and with photomutants of the two species (D) in darkness (gray bars) and light (yellow bars), respectively. (E) Boxplots depicting light-induced changes ( $\Delta$ ) of nerve discharge rates in preparations containing WT microorganisms (E1) in comparison with photomutants (PM) or controls without *C. reinhardtii* (E2) or *Synechocystis* 6803 (E3); number of experiments indicated in parentheses. \*,  $p < 0.05$ , Mann Whitney *U*-test, Bonferroni-corrected; n.s. not significant. (F) Correlation between *superior oblique* nerve discharge rate changes ( $\Delta$ ) and ventricular O<sub>2</sub> concentration, revealing a significant linear dependency ( $p < 0.0001$ ); (G) Ventricular O<sub>2</sub> concentration, nerve spiking and mean firing rate during illumination of a preparation with WT *C. reinhardtii* (G1); note that the O<sub>2</sub> level is transiently interrupted (▼ in G1) during spike bursts (inset below); overlays and average of transient interruptions of ventricular O<sub>2</sub> concentrations (gray and green traces) and mean firing rates (gray and black traces in G2) confirm the temporal match (dotted line) of the two parameters.
